# Supplementary material
Source: PubMed Central journal article supplement (PMC3190829)
Supplement: supp_M111.277350_jbc.M111.277350-1.pdf [file supp_M111.277350_jbc.M111.277350-1.pdf]

## Supplemental Data

### HIGHLY EFFICIENT AND MORE GENERAL *CIS*- AND *TRANS*-SPLICING INTEINS THROUGH SEQUENTIAL DIRECTED EVOLUTION

Julia H. Appleby-Tagoe<sup>a,\*</sup>, Ilka V. Thiel<sup>b,\*</sup>, Yi Wang<sup>a</sup>, Yanfei Wang<sup>a</sup>, Henning D. Mootz<sup>b,#</sup>, and Xiang-Qin Liu<sup>a,#</sup>

<sup>a</sup> Department of Biochemistry and Molecular Biology, Dalhousie University, Halifax, Nova Scotia, B3H 1X5, Canada

<sup>b</sup> University of Muenster, Institute of Biochemistry, Wilhelm-Klemm-Str. 2, 48149 Muenster, Germany

\* These authors contributed equally

# To whom correspondence should be addressed: E-mail: [Paul.Liu@Dal.Ca](mailto:Paul.Liu@Dal.Ca), [Henning.Mootz@uni-muenster.de](mailto:Henning.Mootz@uni-muenster.de)

#### Table of contents

|                                                                                                                         |     |
|-------------------------------------------------------------------------------------------------------------------------|-----|
| Figure S1: Structural presentation of selected insertion sites in the KanR protein.                                     | S-2 |
| Figure S2: C-terminal cleavage activity of inteins with mutated N-terminal splice junction.                             | S-3 |
| Table S1: Contributions of individual mutations to the splicing efficiency at the insertion site 1 in the KanR protein. | S-4 |

Figure S1

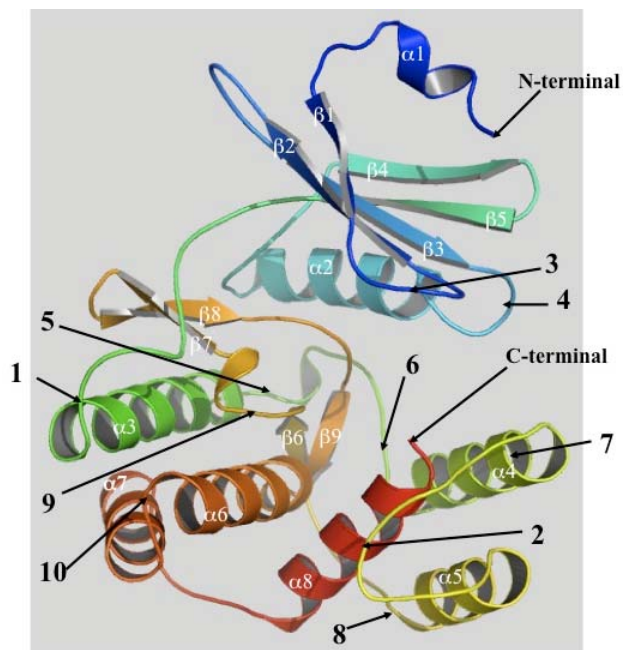

**FIGURE S1: Structural presentation of selected insertion sites in the KanR protein.** The ribbon structure is adapted from the crystal structure (32) of APH(3')-IIa, which is homologous to the APH(3')-I KanR protein used in this study. The selected insertion sites are numbered 1 through 10 and marked with arrows.

Figure S2

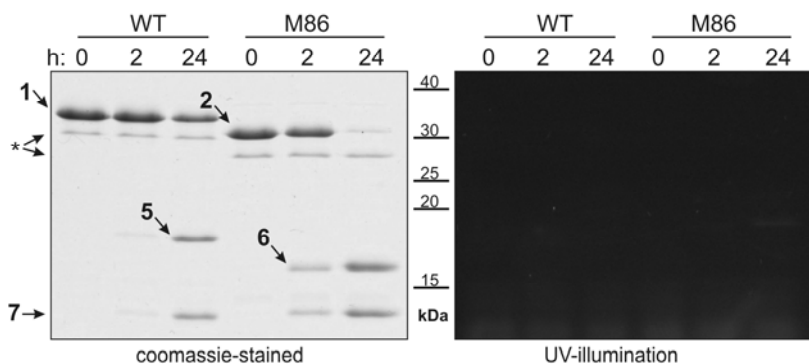

**FIGURE S2: C-terminal cleavage activity of inteins with mutated N-terminal splice junction.** The peptide containing an alanine at the position of the catalytic Cys1 (pep3, 75  $\mu$ M) was incubated with constructs **1** (wild-type, 15  $\mu$ M) and **2** (M86 mutant, 15  $\mu$ M) for 24 h at 25°C. Aliquots were withdrawn at the indicated time points and the reaction mixtures were separated by SDS-PAGE and analyzed using Coomassie Brilliant Blue staining (left) and UV-illumination (right). See Fig. 3 for the numbering of the proteins and for the calculated molecular weights. The asterisk denotes contaminant impurity protein bands.

Supplemental Data

**Table S1:** Contributions of individual mutations to the splicing efficiency at the insertion site 1 in the KanR protein.

| <b>Mutant Inteins</b> | <b>Mutations<sup>a</sup></b> | <b>Splicing Efficiency (%)<br/>At Insertion Site 1</b> |
|-----------------------|------------------------------|--------------------------------------------------------|
| WT                    |                              | <5                                                     |
| M1                    | K20R D24G I58T               | 73                                                     |
| M1-1                  | K20R                         | 8                                                      |
| M3-1                  | D24G                         | 11                                                     |
| M3-2                  | I58T                         | 30                                                     |
| M1-2                  | K20R D24G                    | 24                                                     |
| M3                    | D24G I58T                    | 36                                                     |

<sup>a</sup> All mutations are relative to the wild-type sequence of the *Ssp* DnaB mini-intein.
